# Supplementary material for: Liquid Chromatography-Tandem Mass Spectrometry for the Simultaneous Analysis of 353 Pesticides in the Edible Insect Tenebrio molitor Larvae (Mealworms)
Source: PubMed Central journal article supplement (PMC7764178; doi:10.3390/molecules25245866), 2020-12-11
Supplement: molecules-25-05866-s001.pdf [file molecules-25-05866-s001.pdf]

Supplementary Material

# Liquid Chromatography-Tandem Mass Spectrometry for the Simultaneous Analysis of 353 Pesticides in the Edible Insect *Tenebrio molitor* Larvae (Mealworms)

Yongho Shin <sup>1</sup>, Chang Jo Kim <sup>1</sup>, Sujin Baek <sup>1</sup>, Leesun Kim <sup>1</sup>, Kyeong-Ae Son <sup>1</sup>, Hee-Dong Lee <sup>1</sup>, Danbi Kim <sup>1</sup>, Jeong-Han Kim <sup>2</sup> and Hyun Ho Noh <sup>1,\*</sup>

<sup>1</sup> Residual Agrochemical Assessment Division, National Institute of Agricultural Sciences, Rural Development Administration, Iseo-myeon, Wanju-gun, Jeollabuk-do 55365, South Korea; yong6103@korea.kr (Y.S.); rlawkdwh1@gmail.com (C.J.K.); bsj920@gmail.com (S.B.); twosuns@korea.kr (L.K.); sky199@korea.kr (K.-A.S.); yihd@korea.kr (H.-D.L.); danbi6334@korea.kr (D.K.)

<sup>2</sup> Pesticide Chemistry and Toxicology Laboratory, Department of Agricultural Biotechnology and Research Institute of Agriculture and Life Sciences, Seoul National University, Seoul 08826, South Korea; kjh2404@snu.ac.kr

\* Correspondence: noh1983@korea.kr; Tel.: +82-63-238-3225

## Contents

|                                                                                                                                                                                                                                                                                                                                                             |       |
|-------------------------------------------------------------------------------------------------------------------------------------------------------------------------------------------------------------------------------------------------------------------------------------------------------------------------------------------------------------|-------|
| <b>Table S1.</b> Retention times ( $t_R$ ) and multiple reaction monitoring (MRM) transition profiles including the $m/z$ values of precursors and product ions, declustering potential (DP), entrance potential (EP), collision energy (CE), and cell exit potential (CXP) for 353 target compounds.....                                                   | p. 2  |
| <b>Table S2.</b> Recovery results of representative pesticides that showed a difference in recovery rate depending on number of acetonitrile-hexane partition rounds ( $N = 1, 2,$ and $3$ ). Each partitioning round was conducted with acetonitrile extraction using QuEChERS original salts (NaCl and $MgSO_4$ ) and dSPE cleanup using PSA sorbent..... | p. 12 |
| <b>Table S3.</b> Comparison of four QuEChERS extraction combinations and distribution of recovery results for 353 target pesticides. Each extraction was conducted with acetonitrile-hexane partitioning ( $N = 3$ ) followed by dSPE cleanup using PSA.....                                                                                                | p. 13 |
| <b>Table S4.</b> Recovery results of representative pesticides that showed different recovery rate depending on dSPE sorbent combination (PSA+C18, PSA, and C18). Each dSPE cleanup was conducted with acetonitrile extraction using EN 15662 salts followed by acetonitrile-hexane partitioning ( $N = 3$ ).....                                           | p. 14 |
| <b>Figure S1.</b> Mealworms grown in wheat bran.....                                                                                                                                                                                                                                                                                                        | p. 15 |

**Table S1.** Retention times ( $t_R$ ) and multiple reaction monitoring (MRM) transition profiles including the  $m/z$  values of precursors and product ions, declustering potential (DP), entrance potential (EP), collision energy (CE), and cell exit potential (CXP) for 353 target compounds.

| No. | Compound Name             | $t_R$ | Ionization | Quantitation ion MRM transition profiles |                       |     |    |    |     | Confirmation ion MRM transition profiles |                       |     |    |     |     |
|-----|---------------------------|-------|------------|------------------------------------------|-----------------------|-----|----|----|-----|------------------------------------------|-----------------------|-----|----|-----|-----|
|     |                           |       |            | Precursor ion ( $m/z$ )                  | Product ion ( $m/z$ ) | DP  | EP | CE | CXP | Precursor ion ( $m/z$ )                  | Product ion ( $m/z$ ) | DP  | EP | CE  | CXP |
| 1   | Abamectin                 | 13.67 | Positive   | 890.5                                    | 305.3                 | 86  | 10 | 31 | 12  | 890.5                                    | 567.4                 | 76  | 10 | 19  | 12  |
| 2   | Acetamiprid               | 4.05  | Positive   | 223.1                                    | 125.9                 | 96  | 10 | 29 | 10  | 223.1                                    | 90.1                  | 96  | 10 | 43  | 8   |
| 3   | Acibenzolar-S-methyl      | 8.20  | Positive   | 211.0                                    | 135.9                 | 90  | 10 | 40 | 10  | 211.0                                    | 91.0                  | 90  | 10 | 27  | 10  |
| 4   | Alachlor                  | 9.29  | Positive   | 270.2                                    | 238.1                 | 90  | 10 | 15 | 10  | 270.2                                    | 148.0                 | 90  | 10 | 34  | 10  |
| 5   | Aldicarb sulfoxide        | 3.38  | Positive   | 207.0                                    | 131.9                 | 71  | 10 | 9  | 10  | 207.1                                    | 65.0                  | 51  | 10 | 21  | 6   |
| 6   | Alidcarb sulfone          | 3.47  | Positive   | 240.0                                    | 86.1                  | 66  | 10 | 27 | 4   | 240.0                                    | 148.0                 | 66  | 10 | 19  | 18  |
| 7   | Allethrin                 | 11.82 | Positive   | 303.2                                    | 134.9                 | 90  | 10 | 16 | 10  | 303.2                                    | 91.0                  | 90  | 10 | 55  | 10  |
| 8   | Ametoctradin              | 10.72 | Positive   | 276.2                                    | 176.2                 | 141 | 10 | 49 | 8   | 276.2                                    | 149.1                 | 141 | 10 | 51  | 14  |
| 9   | Ametryn                   | 7.28  | Positive   | 228.2                                    | 186.2                 | 90  | 10 | 26 | 10  | 228.2                                    | 95.9                  | 90  | 10 | 35  | 10  |
| 10  | Anilofos                  | 9.92  | Positive   | 368.0                                    | 199.1                 | 90  | 10 | 20 | 10  | 368.0                                    | 125.0                 | 90  | 10 | 43  | 10  |
| 11  | Aramite                   | 11.77 | Positive   | 352.2                                    | 191.3                 | 90  | 10 | 17 | 10  | 352.2                                    | 57.2                  | 90  | 10 | 35  | 10  |
| 12  | Aspon                     | 12.64 | Positive   | 379.0                                    | 115.1                 | 90  | 10 | 45 | 10  | 379.0                                    | 211.0                 | 90  | 10 | 26  | 10  |
| 13  | Atrazine                  | 6.77  | Positive   | 216.1                                    | 174.1                 | 90  | 10 | 25 | 10  | 216.1                                    | 103.9                 | 90  | 10 | 25  | 10  |
| 14  | Azaconazole               | 7.06  | Positive   | 300.0                                    | 158.9                 | 90  | 10 | 36 | 10  | 300.0                                    | 231.0                 | 90  | 10 | 24  | 10  |
| 15  | Azimsulfuron              | 6.69  | Positive   | 425.2                                    | 182.1                 | 61  | 10 | 21 | 8   | 425.2                                    | 156.2                 | 61  | 10 | 43  | 8   |
| 16  | Azinphos-ethyl            | 8.98  | Positive   | 346.0                                    | 132.1                 | 81  | 10 | 23 | 8   | 346.0                                    | 77.2                  | 81  | 10 | 55  | 4   |
| 17  | Azinphos-methyl           | 7.35  | Positive   | 318.0                                    | 132.1                 | 56  | 10 | 21 | 4   | 318.0                                    | 160.2                 | 56  | 10 | 13  | 4   |
| 18  | Azoxystrobin              | 7.55  | Positive   | 404.1                                    | 372.1                 | 74  | 10 | 19 | 4   | 404.1                                    | 344.1                 | 74  | 10 | 27  | 4   |
| 19  | Benalaxyl                 | 10.07 | Positive   | 326.3                                    | 148.1                 | 90  | 10 | 28 | 10  | 326.3                                    | 91.1                  | 90  | 10 | 56  | 10  |
| 20  | Bendiocarb                | 5.55  | Positive   | 224.1                                    | 109.1                 | 61  | 10 | 23 | 4   | 224.1                                    | 167.2                 | 61  | 10 | 13  | 4   |
| 21  | Benodanil                 | 6.55  | Positive   | 324.1                                    | 231.0                 | 90  | 10 | 32 | 10  | 324.1                                    | 203.1                 | 90  | 10 | 50  | 10  |
| 22  | Benoxacor                 | 7.59  | Positive   | 260.1                                    | 149.2                 | 90  | 10 | 25 | 10  | 262.1                                    | 149.2                 | 90  | 10 | 25  | 10  |
| 23  | Bensulfuron-methyl        | 7.32  | Positive   | 411.1                                    | 148.9                 | 86  | 10 | 27 | 4   | 411.0                                    | 119.0                 | 81  | 10 | 51  | 4   |
| 24  | Bensulide                 | 9.49  | Positive   | 398.0                                    | 158.0                 | 141 | 10 | 33 | 12  | 398.0                                    | 218.1                 | 141 | 10 | 23  | 26  |
| 25  | Benthiavalicarb-isopropyl | 8.47  | Positive   | 382.2                                    | 180.1                 | 82  | 10 | 41 | 4   | 382.2                                    | 116.1                 | 82  | 10 | 32  | 4   |
| 26  | Benzobicyclon             | 8.24  | Positive   | 447.0                                    | 257.1                 | 136 | 10 | 33 | 10  | 447.0                                    | 229.1                 | 136 | 10 | 53  | 18  |
| 27  | Benzoximate               | 10.50 | Positive   | 364.0                                    | 199.1                 | 56  | 10 | 17 | 4   | 364.0                                    | 105.1                 | 56  | 10 | 31  | 4   |
| 28  | Benzoylprop-ethyl         | 10.16 | Positive   | 366.2                                    | 104.9                 | 90  | 10 | 22 | 10  | 368.2                                    | 105.1                 | 90  | 10 | 22  | 10  |
| 29  | Bitertanol                | 10.43 | Positive   | 338.2                                    | 269.2                 | 31  | 10 | 13 | 18  | 338.2                                    | 70.1                  | 31  | 10 | 13  | 6   |
| 30  | Bixafen                   | 9.57  | Positive   | 413.9                                    | 265.9                 | 141 | 10 | 31 | 22  | 413.9                                    | 374.1                 | 141 | 10 | 31  | 32  |
| 31  | Boscalid                  | 8.12  | Positive   | 343.0                                    | 307.0                 | 94  | 10 | 27 | 4   | 343.0                                    | 140.0                 | 116 | 10 | 27  | 4   |
| 32  | Broflanilide              | 10.66 | Positive   | 665.0                                    | 556.0                 | 201 | 10 | 67 | 14  | 665.0                                    | 506.1                 | 201 | 10 | 81  | 32  |
| 33  | Broflanilide_DM-8007      | 11.03 | Positive   | 649.0                                    | 242.1                 | 271 | 10 | 29 | 18  | 649.0                                    | 77.2                  | 271 | 10 | 129 | 6   |

| No.  | Compound Name                | tr    | Ionization | Quantitation ion MRM transition profiles |                   |     |    |    |     | Confirmation ion MRM transition profiles |                   |     |    |    |     |
|------|------------------------------|-------|------------|------------------------------------------|-------------------|-----|----|----|-----|------------------------------------------|-------------------|-----|----|----|-----|
|      |                              |       |            | Precursor ion (m/z)                      | Product ion (m/z) | DP  | EP | CE | CXP | Precursor ion (m/z)                      | Product ion (m/z) | DP  | EP | CE | CXP |
| 34   | Broflanilide_S (PFP-OH)-8007 | 9.13  | Positive   | 661.0                                    | 551.0             | 216 | 10 | 75 | 28  | 661.0                                    | 454.1             | 216 | 10 | 77 | 8   |
| 35   | Bromacil                     | 5.66  | Positive   | 261.0                                    | 205.0             | 61  | 10 | 19 | 4   | 261.0                                    | 188.0             | 61  | 10 | 37 | 4   |
| 36   | Bromobutide                  | 9.16  | Positive   | 312.2                                    | 194.0             | 90  | 10 | 16 | 10  | 314.2                                    | 196.0             | 90  | 10 | 16 | 10  |
| 37-1 | Bromuconazole_1              | 8.73  | Positive   | 378.1                                    | 158.9             | 91  | 10 | 37 | 12  | 378.1                                    | 70.1              | 91  | 10 | 25 | 6   |
| 37-2 | Bromuconazole_2              | 9.71  | Positive   | 378.1                                    | 158.9             | 91  | 10 | 37 | 12  | 378.1                                    | 70.1              | 91  | 10 | 25 | 6   |
| 38   | Bupirimate                   | 9.15  | Positive   | 317.2                                    | 166.2             | 90  | 10 | 32 | 10  | 317.2                                    | 108.0             | 90  | 10 | 35 | 10  |
| 39   | Buprofezin                   | 11.68 | Positive   | 306.2                                    | 201.1             | 66  | 10 | 17 | 4   | 306.2                                    | 116.2             | 66  | 10 | 21 | 4   |
| 40   | Butocarboxim                 | 4.81  | Positive   | 213.0                                    | 75.1              | 56  | 10 | 19 | 6   | 213.0                                    | 156.1             | 56  | 10 | 15 | 10  |
| 41   | Cadusafos                    | 10.83 | Positive   | 271.1                                    | 159.0             | 86  | 10 | 19 | 4   | 271.0                                    | 131.0             | 71  | 10 | 31 | 4   |
| 42   | Cafenstrole                  | 8.56  | Positive   | 351.1                                    | 100.1             | 76  | 10 | 13 | 10  | 351.1                                    | 72.1              | 76  | 10 | 43 | 6   |
| 43   | Carbaryl                     | 5.92  | Positive   | 202.1                                    | 144.9             | 51  | 10 | 15 | 4   | 202.1                                    | 127.1             | 71  | 10 | 39 | 4   |
| 44   | Carbendazim                  | 3.78  | Positive   | 192.2                                    | 160.2             | 76  | 10 | 27 | 4   | 192.2                                    | 132.1             | 76  | 10 | 41 | 4   |
| 45   | Carbetamide                  | 5.17  | Positive   | 237.2                                    | 120.0             | 66  | 10 | 21 | 10  | 237.2                                    | 72.1              | 66  | 10 | 41 | 12  |
| 46   | Carbofuran                   | 5.61  | Positive   | 222.1                                    | 123.0             | 56  | 10 | 29 | 4   | 222.1                                    | 165.2             | 56  | 10 | 17 | 4   |
| 47   | Carbofuran-3-hydroxy         | 4.06  | Positive   | 238.0                                    | 163.0             | 126 | 10 | 21 | 12  | 238.0                                    | 107.0             | 126 | 10 | 41 | 10  |
| 48   | Carboxin                     | 5.97  | Positive   | 236.1                                    | 142.9             | 64  | 10 | 21 | 4   | 236.0                                    | 87.0              | 61  | 10 | 33 | 4   |
| 49   | Carfentrazone-ethyl          | 9.78  | Positive   | 412.0                                    | 366.1             | 85  | 10 | 25 | 4   | 412.0                                    | 346.1             | 85  | 10 | 27 | 4   |
| 50   | Carpropamid                  | 9.99  | Positive   | 334.1                                    | 103.0             | 111 | 10 | 59 | 8   | 334.1                                    | 196.1             | 111 | 10 | 19 | 14  |
| 51   | Chlorantraniliprole          | 7.29  | Positive   | 484.0                                    | 452.9             | 51  | 10 | 31 | 36  | 484.0                                    | 285.8             | 51  | 10 | 21 | 18  |
| 52   | Chlorbenzuron                | 9.84  | Positive   | 309.2                                    | 156.0             | 126 | 10 | 19 | 12  | 309.2                                    | 138.9             | 126 | 10 | 39 | 10  |
| 53   | Chlorfenvinphos              | 10.13 | Positive   | 359.0                                    | 155.1             | 90  | 10 | 17 | 10  | 359.0                                    | 99.1              | 90  | 10 | 44 | 10  |
| 54   | Chlorimuron-ethyl            | 8.17  | Positive   | 415.0                                    | 185.9             | 126 | 10 | 25 | 14  | 415.0                                    | 120.9             | 126 | 10 | 59 | 8   |
| 55   | Chlorotoluron                | 6.48  | Positive   | 213.0                                    | 72.0              | 136 | 10 | 25 | 4   | 213.0                                    | 140.0             | 136 | 10 | 33 | 14  |
| 56   | Chloroxuron                  | 8.71  | Positive   | 291.2                                    | 72.2              | 90  | 10 | 25 | 10  | 291.2                                    | 164.0             | 90  | 10 | 24 | 10  |
| 57   | Chlorpyrifos                 | 12.26 | Positive   | 349.9                                    | 96.9              | 61  | 10 | 41 | 4   | 350.0                                    | 198.0             | 76  | 10 | 25 | 4   |
| 58   | Chlorsulfuron                | 5.77  | Positive   | 358.0                                    | 141.0             | 71  | 10 | 23 | 4   | 358.0                                    | 167.0             | 91  | 10 | 25 | 4   |
| 59   | Chromafenozide               | 8.82  | Positive   | 395.2                                    | 175.0             | 91  | 10 | 25 | 14  | 395.3                                    | 147.1             | 71  | 10 | 59 | 14  |
| 60   | Clethodim                    | 11.27 | Positive   | 360.0                                    | 164.0             | 81  | 10 | 25 | 4   | 360.1                                    | 268.2             | 84  | 10 | 17 | 4   |
| 61   | Clofentezine                 | 10.58 | Positive   | 303.0                                    | 138.0             | 96  | 10 | 21 | 4   | 303.1                                    | 102.1             | 76  | 10 | 47 | 4   |
| 62   | Clomazone                    | 7.57  | Positive   | 240.1                                    | 125.0             | 66  | 10 | 27 | 4   | 240.0                                    | 89.0              | 66  | 10 | 65 | 4   |
| 63   | Clothianidin                 | 3.92  | Positive   | 250.0                                    | 132.0             | 71  | 10 | 21 | 4   | 250.0                                    | 169.1             | 94  | 10 | 19 | 4   |
| 64   | Coumaphos                    | 10.05 | Positive   | 363.1                                    | 227.1             | 90  | 10 | 36 | 10  | 363.1                                    | 307.1             | 90  | 10 | 25 | 10  |
| 65   | Crotoxyphos                  | 8.06  | Positive   | 332.3                                    | 211.0             | 90  | 10 | 11 | 10  | 332.3                                    | 127.0             | 90  | 10 | 34 | 10  |
| 66   | Crufomate                    | 9.48  | Positive   | 292.0                                    | 235.9             | 136 | 10 | 27 | 18  | 292.0                                    | 107.9             | 136 | 10 | 37 | 10  |
| 67   | Cyanazine                    | 5.12  | Positive   | 241.2                                    | 214.1             | 90  | 10 | 23 | 10  | 243.2                                    | 216.1             | 90  | 10 | 23 | 10  |
| 68   | Cyazofamid                   | 9.14  | Positive   | 325.0                                    | 108.0             | 76  | 10 | 19 | 4   | 325.0                                    | 261.0             | 76  | 10 | 15 | 4   |
| 69   | Cyclosulfamuron              | 8.72  | Positive   | 422.0                                    | 261.0             | 56  | 10 | 25 | 24  | 422.0                                    | 218.0             | 56  | 10 | 37 | 16  |

| No.  | Compound Name                      | tr    | Ionization | Quantitation ion MRM transition profiles |                   |     |    |    |     | Confirmation ion MRM transition profiles |                   |     |     |    |     |
|------|------------------------------------|-------|------------|------------------------------------------|-------------------|-----|----|----|-----|------------------------------------------|-------------------|-----|-----|----|-----|
|      |                                    |       |            | Precursor ion (m/z)                      | Product ion (m/z) | DP  | EP | CE | CXP | Precursor ion (m/z)                      | Product ion (m/z) | DP  | EP  | CE | CXP |
| 70   | Cyflufenamid                       | 10.36 | Positive   | 413.1                                    | 295.2             | 24  | 10 | 21 | 4   | 413.1                                    | 241.0             | 24  | 10  | 32 | 4   |
| 71   | Cyhalofop-butyl                    | 10.88 | Positive   | 375.1                                    | 256.1             | 76  | 10 | 21 | 4   | 375.2                                    | 120.1             | 76  | 10  | 41 | 4   |
| 72   | Cymoxanil                          | 4.42  | Positive   | 199.0                                    | 128.2             | 76  | 10 | 13 | 6   | 199.0                                    | 111.1             | 76  | 10  | 25 | 4   |
| 73   | Cyprazine                          | 6.88  | Positive   | 228.1                                    | 186.1             | 90  | 10 | 25 | 10  | 230.1                                    | 188.1             | 90  | 10  | 25 | 10  |
| 74   | Cyprodinil                         | 9.74  | Positive   | 226.1                                    | 93.1              | 90  | 10 | 50 | 10  | 226.1                                    | 77.0              | 90  | 10  | 60 | 10  |
| 75   | Daimuron                           | 8.50  | Positive   | 269.1                                    | 151.1             | 56  | 10 | 17 | 12  | 269.1                                    | 119.1             | 56  | 10  | 27 | 10  |
| 76   | Demeton-S                          | 7.64  | Positive   | 259.0                                    | 89.1              | 46  | 10 | 19 | 6   | 259.0                                    | 61.0              | 46  | 10  | 45 | 8   |
| 77   | Demeton-S-methyl                   | 5.75  | Positive   | 231.0                                    | 89.0              | 56  | 10 | 13 | 8   | 231.0                                    | 61.0              | 56  | 10  | 41 | 8   |
| 78   | Demeton-S-methyl sulfone           | 3.59  | Positive   | 262.9                                    | 169.0             | 101 | 10 | 21 | 18  | 262.9                                    | 109.0             | 101 | 10  | 41 | 10  |
| 79   | Demeton-S-methyl sulfoxide         | 3.52  | Positive   | 247.0                                    | 169.0             | 61  | 10 | 19 | 12  | 247.0                                    | 109.0             | 61  | 10  | 37 | 8   |
| 80   | Desmetryn                          | 6.14  | Positive   | 214.1                                    | 172.1             | 90  | 10 | 25 | 10  | 214.1                                    | 82.2              | 90  | 10  | 40 | 10  |
| 81   | Diazinon                           | 10.21 | Positive   | 305.1                                    | 169.1             | 76  | 10 | 27 | 4   | 305.1                                    | 153.3             | 76  | 10  | 27 | 4   |
| 82   | Diclobutrazol                      | 9.77  | Positive   | 328.1                                    | 70.1              | 90  | 10 | 50 | 10  | 330.1                                    | 70.1              | 90  | 10  | 50 | 10  |
| 83   | Dicrotophos                        | 3.70  | Positive   | 238.0                                    | 112.1             | 81  | 10 | 15 | 10  | 238.0                                    | 127.0             | 81  | 10  | 21 | 12  |
| 84   | Diethatyl-ethyl                    | 9.67  | Positive   | 312.3                                    | 162.2             | 90  | 10 | 35 | 10  | 312.3                                    | 147.1             | 90  | 10  | 52 | 10  |
| 85   | Diethofencarb                      | 7.79  | Positive   | 268.1                                    | 226.1             | 69  | 10 | 15 | 4   | 268.0                                    | 180.0             | 66  | 10  | 23 | 4   |
| 86   | Difenoconazole                     | 10.71 | Positive   | 406.1                                    | 251.0             | 90  | 10 | 35 | 10  | 406.1                                    | 337.0             | 90  | 10  | 25 | 10  |
| 87   | Diflubenzuron                      | 9.42  | Positive   | 311.0                                    | 158.0             | 66  | 10 | 19 | 4   | 311.0                                    | 141.2             | 66  | 10  | 47 | 4   |
| 88   | Diflufenican                       | 10.95 | Positive   | 395.1                                    | 266.1             | 90  | 10 | 33 | 10  | 395.1                                    | 246.2             | 90  | 10  | 50 | 10  |
| 89   | Dimepiperate                       | 11.10 | Positive   | 264.1                                    | 145.9             | 54  | 10 | 15 | 4   | 264.1                                    | 119.0             | 54  | 10  | 23 | 4   |
| 90   | Dimethachlor                       | 7.29  | Positive   | 256.2                                    | 224.2             | 90  | 10 | 20 | 10  | 256.2                                    | 148.2             | 90  | 10  | 35 | 10  |
| 91   | Dimethametryn                      | 9.38  | Positive   | 256.2                                    | 186.1             | 71  | 10 | 27 | 4   | 256.2                                    | 68.0              | 71  | 10  | 61 | 4   |
| 92   | Dimethenamide                      | 8.14  | Positive   | 276.1                                    | 244.1             | 66  | 10 | 17 | 4   | 276.1                                    | 168.3             | 66  | 10  | 33 | 4   |
| 93   | Dimethoate                         | 4.17  | Positive   | 230.0                                    | 198.9             | 90  | 10 | 12 | 10  | 230.0                                    | 125.1             | 90  | 10  | 29 | 10  |
| 94-1 | Dimethomorph_1                     | 7.83  | Positive   | 388.1                                    | 301.1             | 81  | 10 | 27 | 4   | 388.1                                    | 165.2             | 86  | 10  | 45 | 4   |
| 94-2 | Dimethomorph_2                     | 8.28  | Positive   | 388.1                                    | 301.1             | 81  | 10 | 27 | 4   | 388.1                                    | 165.2             | 86  | 10  | 45 | 4   |
| 95   | Dimethylaminosulfotoluidide (DMST) | 5.72  | Positive   | 215.2                                    | 106.1             | 90  | 10 | 20 | 10  | 215.2                                    | 77.1              | 90  | 10  | 55 | 10  |
| 96   | Dimethylvinphos (E)                | 9.13  | Positive   | 331.1                                    | 127.0             | 90  | 10 | 16 | 10  | 333.1                                    | 127.0             | 90  | 10  | 16 | 10  |
| 97   | Dimethylvinphos (Z)                | 8.71  | Positive   | 331.1                                    | 127.0             | 90  | 10 | 15 | 10  | 333.1                                    | 127.0             | 90  | 10  | 15 | 10  |
| 98   | Diniconazole                       | 10.67 | Positive   | 326.0                                    | 70.0              | 74  | 10 | 45 | 4   | 326.0                                    | 159.0             | 76  | 10  | 43 | 4   |
| 99   | Dinotefuran                        | 3.40  | Positive   | 203.2                                    | 129.1             | 71  | 10 | 17 | 8   | 203.2                                    | 114.1             | 71  | 10  | 17 | 10  |
| 100  | Diphenamid                         | 7.24  | Positive   | 240.1                                    | 134.1             | 89  | 10 | 29 | 4   | 240.2                                    | 167.2             | 41  | 7.5 | 14 | 33  |
| 101  | Dithiopyr                          | 11.06 | Positive   | 402.1                                    | 353.9             | 91  | 10 | 23 | 4   | 402.1                                    | 272.1             | 91  | 10  | 38 | 4   |
| 102  | Diuron                             | 7.01  | Positive   | 233.1                                    | 72.1              | 101 | 10 | 21 | 6   | 233.1                                    | 160.0             | 101 | 10  | 37 | 12  |
| 103  | Edifenphos                         | 9.90  | Positive   | 310.9                                    | 109.0             | 131 | 10 | 47 | 10  | 310.9                                    | 111.1             | 131 | 10  | 29 | 6   |
| 104  | Esprocarb                          | 11.77 | Positive   | 266.1                                    | 91.0              | 76  | 10 | 35 | 4   | 266.1                                    | 65.0              | 76  | 10  | 79 | 4   |
| 105  | Etaconazole                        | 9.13  | Positive   | 328.1                                    | 159.1             | 90  | 10 | 36 | 10  | 330.1                                    | 161.1             | 90  | 10  | 36 | 10  |

| No. | Compound Name           | tr    | Ionization | Quantitation ion MRM transition profiles |                   |      |     |     |     | Confirmation ion MRM transition profiles |                   |      |     |     |     |
|-----|-------------------------|-------|------------|------------------------------------------|-------------------|------|-----|-----|-----|------------------------------------------|-------------------|------|-----|-----|-----|
|     |                         |       |            | Precursor ion (m/z)                      | Product ion (m/z) | DP   | EP  | CE  | CXP | Precursor ion (m/z)                      | Product ion (m/z) | DP   | EP  | CE  | CXP |
| 106 | Ethaboxam               | 6.23  | Positive   | 321.0                                    | 183.1             | 86   | 10  | 33  | 4   | 321.0                                    | 200.1             | 86   | 10  | 39  | 4   |
| 107 | Ethiofencarb            | 6.26  | Positive   | 226.1                                    | 169.0             | 61   | 10  | 9   | 12  | 226.1                                    | 164.0             | 61   | 10  | 11  | 16  |
| 108 | Ethoprophos             | 9.17  | Positive   | 243.0                                    | 97.0              | 71   | 10  | 41  | 4   | 243.0                                    | 131.0             | 66   | 10  | 29  | 4   |
| 109 | Ethoxysulfuron          | 8.41  | Positive   | 399.1                                    | 261.0             | 59   | 10  | 21  | 4   | 399.1                                    | 218.2             | 41   | 7   | 18  | 33  |
| 110 | Etofenprox              | 14.54 | Positive   | 394.2                                    | 177.1             | 61   | 10  | 21  | 18  | 394.2                                    | 107.0             | 61   | 10  | 61  | 12  |
| 111 | Etoazole                | 12.40 | Positive   | 360.2                                    | 141.0             | 76   | 10  | 37  | 4   | 360.1                                    | 57.2              | 76   | 10  | 45  | 4   |
| 112 | Etrifos                 | 10.08 | Positive   | 293.1                                    | 125.0             | 64   | 10  | 33  | 4   | 293.0                                    | 265.0             | 61   | 10  | 21  | 4   |
| 113 | Famoxadone              | 10.08 | Positive   | 392.0                                    | 331.0             | 51   | 10  | 15  | 4   | 392.2                                    | 238.0             | 54   | 10  | 23  | 4   |
| 114 | Fenamiphos              | 9.45  | Positive   | 304.2                                    | 217.1             | 81   | 10  | 31  | 4   | 304.2                                    | 202.1             | 81   | 10  | 47  | 4   |
| 115 | Fenamiphos sulfone      | 5.60  | Positive   | 337.1                                    | 267.1             | 156  | 10  | 29  | 20  | 337.1                                    | 109.1             | 156  | 10  | 47  | 10  |
| 116 | Fenamiphos sulfoxide    | 5.42  | Positive   | 320.0                                    | 233.1             | 156  | 10  | 33  | 16  | 320.0                                    | 171.0             | 156  | 10  | 29  | 14  |
| 117 | Fenazaquin              | 13.43 | Positive   | 307.2                                    | 161.2             | 76   | 10  | 31  | 4   | 307.0                                    | 147.0             | 61   | 10  | 25  | 4   |
| 118 | Fenbuconazole           | 9.24  | Positive   | 337.1                                    | 125.1             | 81   | 10  | 37  | 4   | 337.1                                    | 70.0              | 81   | 10  | 35  | 4   |
| 119 | Fenfuram                | 6.10  | Positive   | 202.1                                    | 109.0             | 90   | 10  | 27  | 10  | 202.1                                    | 120.1             | 90   | 10  | 21  | 10  |
| 120 | Fenhexamid              | 8.95  | Positive   | 302.1                                    | 97.2              | 101  | 10  | 33  | 4   | 302.0                                    | 55.0              | 101  | 10  | 57  | 4   |
| 121 | Fenobucarb              | 7.74  | Positive   | 208.1                                    | 95.0              | 71   | 10  | 19  | 6   | 208.1                                    | 152.0             | 71   | 10  | 11  | 10  |
| 122 | Fenothiocarb            | 9.65  | Positive   | 254.1                                    | 72.0              | 90   | 10  | 21  | 10  | 254.1                                    | 160.1             | 90   | 10  | 14  | 10  |
| 123 | Fenoxanil               | 9.46  | Positive   | 329.1                                    | 302.1             | 90   | 10  | 16  | 10  | 331.1                                    | 304.1             | 90   | 10  | 16  | 10  |
| 124 | Fenoxaprop-ethyl        | 11.41 | Positive   | 362.1                                    | 288.1             | 206  | 10  | 25  | 18  | 362.1                                    | 77.1              | 206  | 10  | 77  | 8   |
| 125 | Fenoxycarb              | 9.54  | Positive   | 302.1                                    | 88.0              | 84   | 10  | 29  | 4   | 302.2                                    | 116.2             | 68   | 10  | 16  | 4   |
| 126 | Fenpropathrin           | 12.59 | Positive   | 367.2                                    | 125.2             | 90   | 10  | 21  | 10  | 367.2                                    | 350.1             | 90   | 10  | 11  | 10  |
| 127 | Fenpropimorph           | 7.45  | Positive   | 304.2                                    | 147.2             | 111  | 10  | 39  | 8   | 304.2                                    | 117.2             | 111  | 10  | 79  | 10  |
| 128 | Fenpyroximate           | 12.74 | Positive   | 422.2                                    | 366.2             | 91   | 10  | 21  | 24  | 422.2                                    | 138.0             | 91   | 10  | 41  | 10  |
| 129 | Fenquinotrione          | 7.35  | Positive   | 425.1                                    | 285.0             | 156  | 10  | 37  | 12  | 425.1                                    | 179.1             | 156  | 10  | 91  | 14  |
| 130 | Fenthion                | 10.06 | Positive   | 279.0                                    | 169.1             | 136  | 10  | 27  | 12  | 279.0                                    | 246.9             | 136  | 10  | 17  | 22  |
| 131 | Fenthion oxon           | 7.35  | Positive   | 263.0                                    | 231.0             | 131  | 10  | 23  | 10  | 263.0                                    | 216.0             | 131  | 10  | 31  | 14  |
| 132 | Fenthion oxon sulfoxide | 3.92  | Positive   | 279.0                                    | 104.0             | 151  | 10  | 37  | 10  | 279.0                                    | 109.1             | 151  | 10  | 53  | 12  |
| 133 | Fenthion sulfoxide      | 5.65  | Positive   | 295.1                                    | 280.0             | 141  | 10  | 27  | 18  | 295.1                                    | 109.1             | 121  | 10  | 41  | 10  |
| 134 | Fenthion-sulfone        | 5.90  | Positive   | 310.9                                    | 124.9             | 126  | 10  | 25  | 10  | 310.9                                    | 278.9             | 126  | 10  | 25  | 10  |
| 135 | Fentrazamide            | 9.91  | Positive   | 350.2                                    | 154.2             | 61   | 10  | 16  | 4   | 350.2                                    | 197.3             | 61   | 10  | 11  | 4   |
| 136 | Ferimzone               | 7.62  | Positive   | 255.1                                    | 91.1              | 121  | 10  | 45  | 8   | 255.1                                    | 65.1              | 121  | 10  | 73  | 6   |
| 137 | Fipronil                | 9.41  | Negative   | 434.8                                    | 329.9             | -95  | -10 | -24 | -21 | 434.8                                    | 249.9             | -95  | -10 | -38 | -19 |
| 138 | Fipronil-sulfone        | 9.88  | Negative   | 450.8                                    | 415.0             | -115 | -10 | -26 | -29 | 450.8                                    | 282.0             | -115 | -10 | -40 | -11 |
| 139 | Flamprop-isopropyl      | 10.00 | Positive   | 364.1                                    | 105.1             | 90   | 10  | 28  | 10  | 364.1                                    | 77.1              | 90   | 10  | 75  | 10  |
| 140 | Flonicamid              | 3.65  | Positive   | 230.0                                    | 203.2             | 76   | 10  | 25  | 4   | 230.0                                    | 97.8              | 76   | 10  | 47  | 4   |
| 141 | Fluacrypyrim            | 10.76 | Positive   | 427.2                                    | 145.0             | 55   | 10  | 34  | 4   | 427.2                                    | 205.1             | 55   | 10  | 14  | 4   |
| 142 | Fluazinam               | 11.74 | Negative   | 462.8                                    | 415.9             | -65  | -10 | -30 | -11 | 462.8                                    | 398.1             | -65  | -10 | -26 | -29 |

| No. | Compound Name       | tr    | Ionization | Quantitation ion MRM transition profiles |                   |      |     |     |     | Confirmation ion MRM transition profiles |                   |      |     |     |     |
|-----|---------------------|-------|------------|------------------------------------------|-------------------|------|-----|-----|-----|------------------------------------------|-------------------|------|-----|-----|-----|
|     |                     |       |            | Precursor ion (m/z)                      | Product ion (m/z) | DP   | EP  | CE  | CXP | Precursor ion (m/z)                      | Product ion (m/z) | DP   | EP  | CE  | CXP |
| 143 | Flucetosulfuron     | 7.62  | Positive   | 488.0                                    | 156.1             | 86   | 10  | 25  | 10  | 488.0                                    | 273.0             | 86   | 10  | 35  | 22  |
| 144 | Fludioxonil         | 7.98  | Negative   | 246.9                                    | 180.0             | -115 | -10 | -42 | -15 | 246.9                                    | 126.0             | -115 | -10 | -42 | -11 |
| 145 | Flufenacet          | 9.06  | Positive   | 364.1                                    | 194.2             | 61   | 10  | 17  | 4   | 364.1                                    | 152.2             | 61   | 10  | 25  | 4   |
| 146 | Flufenoxuron        | 12.29 | Positive   | 489.1                                    | 158.2             | 81   | 10  | 25  | 4   | 489.1                                    | 141.2             | 81   | 10  | 65  | 4   |
| 147 | Fluometuron         | 6.31  | Positive   | 233.1                                    | 145.1             | 121  | 10  | 47  | 8   | 233.1                                    | 168.0             | 81   | 10  | 39  | 12  |
| 148 | Fluopicolide        | 8.38  | Positive   | 383.0                                    | 172.9             | 81   | 10  | 33  | 12  | 383.0                                    | 109.0             | 81   | 10  | 87  | 8   |
| 149 | Fluopyram           | 8.78  | Positive   | 397.1                                    | 145.0             | 90   | 10  | 75  | 10  | 397.1                                    | 173.0             | 90   | 10  | 36  | 10  |
| 150 | Flupyradifuron      | 4.04  | Positive   | 289.0                                    | 125.9             | 106  | 10  | 39  | 10  | 289.0                                    | 72.9              | 106  | 10  | 97  | 20  |
| 151 | Fluquinconazole     | 8.87  | Positive   | 376.0                                    | 307.1             | 94   | 10  | 33  | 4   | 376.0                                    | 349.0             | 91   | 10  | 25  | 4   |
| 152 | Fluridone           | 7.36  | Positive   | 330.0                                    | 309.1             | 201  | 10  | 49  | 26  | 330.0                                    | 294.1             | 201  | 10  | 63  | 22  |
| 153 | Flurochloridone     | 8.63  | Positive   | 312.2                                    | 292.2             | 90   | 10  | 30  | 10  | 312.2                                    | 145.1             | 90   | 10  | 65  | 10  |
| 154 | Flurtamone          | 7.74  | Positive   | 334.1                                    | 247.0             | 90   | 10  | 37  | 10  | 334.1                                    | 178.1             | 90   | 10  | 60  | 10  |
| 155 | Flusilazole         | 9.42  | Positive   | 316.1                                    | 247.1             | 76   | 10  | 25  | 4   | 316.1                                    | 165.1             | 76   | 10  | 39  | 4   |
| 156 | Fluthiacet-methyl   | 9.73  | Positive   | 404.1                                    | 274.1             | 90   | 10  | 39  | 10  | 404.1                                    | 239.1             | 90   | 10  | 50  | 10  |
| 157 | Flutianil           | 9.65  | Positive   | 427.0                                    | 192.2             | 90   | 10  | 34  | 10  | 427.0                                    | 411.1             | 90   | 10  | 43  | 10  |
| 158 | Flutolanil          | 8.25  | Positive   | 324.1                                    | 262.1             | 109  | 10  | 23  | 4   | 324.1                                    | 242.2             | 109  | 10  | 31  | 4   |
| 159 | Flutriafol          | 6.61  | Positive   | 302.2                                    | 70.1              | 91   | 10  | 21  | 6   | 302.2                                    | 95.1              | 91   | 10  | 71  | 8   |
| 160 | Fluxapyroxad        | 8.31  | Positive   | 382.0                                    | 362.0             | 186  | 10  | 21  | 20  | 382.0                                    | 342.0             | 186  | 10  | 29  | 16  |
| 161 | Forchlorfenuron     | 6.90  | Positive   | 248.2                                    | 129.1             | 27   | 10  | 24  | 4   | 248.0                                    | 93.1              | 27   | 10  | 48  | 4   |
| 162 | Fosthiazate         | 6.29  | Positive   | 284.0                                    | 104.0             | 101  | 10  | 27  | 4   | 284.0                                    | 228.0             | 101  | 10  | 15  | 4   |
| 163 | Halosulfuron-methyl | 8.86  | Positive   | 435.1                                    | 182.0             | 76   | 10  | 27  | 14  | 435.1                                    | 139.1             | 76   | 10  | 63  | 12  |
| 164 | Haloxypop           | 9.69  | Negative   | 359.9                                    | 288.0             | -80  | -10 | -22 | -21 | 359.9                                    | 195.9             | -80  | -10 | -58 | -13 |
| 165 | Heptenophos         | 7.01  | Positive   | 251.1                                    | 127.0             | 90   | 10  | 18  | 10  | 251.1                                    | 125.1             | 90   | 10  | 20  | 10  |
| 166 | Hexaconazole        | 10.30 | Positive   | 314.1                                    | 70.1              | 106  | 10  | 25  | 6   | 314.1                                    | 159.0             | 106  | 10  | 43  | 12  |
| 167 | Hexazinone          | 5.64  | Positive   | 253.2                                    | 171.1             | 56   | 10  | 21  | 4   | 253.2                                    | 71.1              | 86   | 10  | 43  | 4   |
| 168 | Hexythiazox         | 12.15 | Positive   | 353.1                                    | 228.0             | 81   | 10  | 21  | 4   | 353.1                                    | 168.1             | 76   | 10  | 37  | 4   |
| 169 | Imazalil            | 6.08  | Positive   | 297.1                                    | 159.0             | 61   | 10  | 29  | 14  | 297.1                                    | 255.0             | 61   | 10  | 25  | 12  |
| 170 | Imazamox            | 4.28  | Positive   | 306.0                                    | 246.1             | 151  | 10  | 33  | 16  | 306.0                                    | 86.2              | 151  | 10  | 35  | 8   |
| 171 | Imazapic            | 4.39  | Positive   | 276.1                                    | 163.1             | 91   | 10  | 37  | 6   | 276.1                                    | 216.3             | 91   | 10  | 33  | 10  |
| 172 | Imazaquin           | 5.47  | Positive   | 312.1                                    | 199.1             | 26   | 10  | 37  | 18  | 312.1                                    | 267.2             | 26   | 10  | 29  | 32  |
| 173 | Imazethapyr         | 5.04  | Positive   | 290.1                                    | 245.2             | 101  | 10  | 29  | 18  | 290.1                                    | 177.0             | 101  | 10  | 37  | 16  |
| 174 | Imazosulfuron       | 8.14  | Negative   | 411.0                                    | 230.0             | -125 | -10 | -24 | -7  | 411.0                                    | 154.1             | -125 | -10 | -34 | -7  |
| 175 | Imicyafos           | 4.97  | Positive   | 305.1                                    | 201.1             | 41   | 4.5 | 14  | 33  | 305.1                                    | 235.2             | 41   | 4.5 | 14  | 23  |
| 176 | Imidacloprid        | 3.84  | Positive   | 256.1                                    | 209.0             | 89   | 10  | 23  | 4   | 256.1                                    | 175.0             | 89   | 10  | 25  | 4   |
| 177 | Inabenfide          | 7.85  | Negative   | 336.9                                    | 122.0             | -125 | -10 | -22 | -11 | 336.9                                    | 230.9             | -125 | -10 | -30 | -13 |
| 178 | Indanofan           | 9.21  | Positive   | 341.2                                    | 187.2             | 90   | 10  | 18  | 10  | 341.2                                    | 175.0             | 90   | 10  | 16  | 10  |
| 179 | Ipconazole          | 11.06 | Positive   | 334.2                                    | 70.2              | 111  | 10  | 53  | 6   | 334.2                                    | 125.0             | 111  | 10  | 47  | 10  |

| No.   | Compound Name        | tr    | Ionization | Quantitation ion MRM transition profiles |                   |     |      |    |     | Confirmation ion MRM transition profiles |                   |     |      |    |     |
|-------|----------------------|-------|------------|------------------------------------------|-------------------|-----|------|----|-----|------------------------------------------|-------------------|-----|------|----|-----|
|       |                      |       |            | Precursor ion (m/z)                      | Product ion (m/z) | DP  | EP   | CE | CXP | Precursor ion (m/z)                      | Product ion (m/z) | DP  | EP   | CE | CXP |
| 180   | Iprobenfos           | 9.71  | Positive   | 289.1                                    | 91.2              | 31  | 10   | 40 | 4   | 289.1                                    | 205.0             | 31  | 10   | 14 | 4   |
| 181   | Iprovalicarb         | 8.90  | Positive   | 321.3                                    | 119.2             | 71  | 10   | 27 | 6   | 321.2                                    | 203.2             | 61  | 10   | 12 | 4   |
| 182   | Isoprocarb           | 6.70  | Positive   | 194.1                                    | 95.1              | 56  | 10   | 21 | 8   | 194.1                                    | 137.0             | 56  | 10   | 13 | 8   |
| 183   | Isoprothiolane       | 8.37  | Positive   | 291.1                                    | 231.1             | 51  | 10   | 17 | 4   | 291.1                                    | 189.0             | 21  | 3.5  | 12 | 29  |
| 184   | Isoproturon          | 6.89  | Positive   | 207.1                                    | 72.1              | 111 | 10   | 25 | 6   | 207.1                                    | 165.1             | 111 | 10   | 19 | 8   |
| 185   | Isopyrazam           | 10.73 | Positive   | 360.1                                    | 244.1             | 76  | 10   | 27 | 4   | 360.1                                    | 320.1             | 76  | 10   | 25 | 4   |
| 186   | Isoxaben             | 8.19  | Positive   | 333.2                                    | 165.2             | 91  | 10   | 27 | 12  | 333.2                                    | 107.2             | 91  | 10   | 83 | 10  |
| 187   | Isoxathion           | 10.36 | Positive   | 314.2                                    | 105.0             | 90  | 10   | 20 | 10  | 314.2                                    | 97.1              | 90  | 10   | 50 | 10  |
| 188   | Kresoxim-methyl      | 9.85  | Positive   | 314.1                                    | 115.9             | 54  | 10   | 21 | 4   | 314.0                                    | 206.0             | 51  | 10   | 13 | 4   |
| 189   | Lenacil              | 6.81  | Positive   | 235.1                                    | 153.1             | 61  | 10   | 21 | 4   | 235.1                                    | 136.0             | 61  | 10   | 47 | 16  |
| 190   | Linuron              | 7.85  | Positive   | 249.0                                    | 159.9             | 89  | 10   | 23 | 4   | 249.0                                    | 182.1             | 89  | 10   | 21 | 4   |
| 191   | Lufenuron            | 11.66 | Positive   | 510.9                                    | 158.2             | 79  | 10   | 27 | 4   | 510.9                                    | 141.2             | 79  | 10   | 67 | 4   |
| 192   | Malaoxon             | 5.55  | Positive   | 315.0                                    | 99.0              | 96  | 10   | 39 | 8   | 315.0                                    | 127.0             | 96  | 10   | 17 | 12  |
| 193   | Malathion            | 8.38  | Positive   | 331.0                                    | 127.0             | 96  | 10   | 17 | 10  | 331.0                                    | 285.0             | 96  | 10   | 11 | 6   |
| 194   | Mandipropamid        | 8.08  | Positive   | 412.1                                    | 328.1             | 31  | 10   | 22 | 4   | 412.1                                    | 125.1             | 31  | 10   | 60 | 4   |
| 195   | Mecarbam             | 9.07  | Positive   | 330.1                                    | 227.0             | 90  | 10   | 12 | 10  | 330.1                                    | 199.0             | 90  | 10   | 20 | 10  |
| 196   | Mefenacet            | 8.66  | Positive   | 299.1                                    | 148.1             | 24  | 10   | 19 | 4   | 299.0                                    | 120.1             | 24  | 10   | 35 | 4   |
| 197   | Mepanipyrim          | 8.97  | Positive   | 224.1                                    | 106.1             | 156 | 10   | 33 | 8   | 224.1                                    | 66.1              | 156 | 10   | 55 | 8   |
| 198   | Mephosfolan          | 5.33  | Positive   | 269.9                                    | 139.9             | 76  | 10   | 37 | 14  | 269.9                                    | 195.9             | 76  | 10   | 19 | 14  |
| 199   | Mepronil             | 8.43  | Positive   | 270.1                                    | 119.0             | 71  | 10   | 31 | 4   | 270.2                                    | 228.1             | 71  | 10   | 19 | 4   |
| 200-1 | Metaflumizone_1      | 10.74 | Positive   | 507.0                                    | 178.0             | 86  | 10   | 29 | 10  | 507.0                                    | 287.2             | 86  | 10   | 31 | 10  |
| 200-2 | Metaflumizone_2      | 11.45 | Positive   | 507.0                                    | 178.0             | 86  | 10   | 29 | 10  | 507.0                                    | 287.2             | 86  | 10   | 31 | 10  |
| 201   | Metalaxyl            | 6.88  | Positive   | 280.1                                    | 220.0             | 71  | 10   | 19 | 4   | 280.2                                    | 192.3             | 71  | 10   | 21 | 4   |
| 202   | Metamifop            | 11.35 | Positive   | 441.1                                    | 288.1             | 41  | 10.5 | 16 | 25  | 441.1                                    | 180.2             | 41  | 10.5 | 16 | 27  |
| 203   | Metamitron           | 4.23  | Positive   | 203.1                                    | 175.2             | 101 | 10   | 23 | 10  | 203.1                                    | 104.1             | 101 | 10   | 33 | 4   |
| 204   | Metazosulfuron       | 7.79  | Positive   | 476.0                                    | 182.0             | 31  | 4.5  | 22 | 25  | 476.0                                    | 295.2             | 31  | 4.5  | 22 | 23  |
| 205   | Metconazole          | 10.37 | Positive   | 320.1                                    | 70.1              | 76  | 10   | 45 | 4   | 320.0                                    | 125.0             | 81  | 10   | 49 | 4   |
| 206   | Methabenzthiazuron   | 6.73  | Positive   | 222.2                                    | 165.1             | 71  | 10   | 23 | 4   | 222.1                                    | 150.3             | 71  | 10   | 41 | 4   |
| 207   | Methamidophos        | 3.22  | Positive   | 142.1                                    | 94.0              | 71  | 10   | 19 | 8   | 142.1                                    | 112.1             | 71  | 10   | 21 | 6   |
| 208   | Methiocarb           | 7.98  | Positive   | 226.1                                    | 169.1             | 81  | 10   | 13 | 12  | 226.1                                    | 107.0             | 81  | 10   | 51 | 8   |
| 209   | Methiocarb sulfone   | 4.07  | Positive   | 275.0                                    | 122.2             | 36  | 10   | 27 | 8   | 275.0                                    | 201.0             | 36  | 10   | 19 | 8   |
| 210   | Methiocarb sulfoxide | 3.87  | Positive   | 242.1                                    | 185.0             | 81  | 10   | 19 | 14  | 242.1                                    | 122.2             | 81  | 10   | 39 | 12  |
| 211   | Methomyl             | 3.61  | Positive   | 163.1                                    | 88.1              | 81  | 10   | 13 | 4   | 163.1                                    | 106.0             | 81  | 10   | 13 | 4   |
| 212   | Methoprotryne        | 7.31  | Positive   | 272.2                                    | 198.1             | 90  | 10   | 31 | 10  | 272.2                                    | 240.1             | 90  | 10   | 26 | 10  |
| 213   | Methoxyfenozide      | 8.37  | Positive   | 369.2                                    | 149.1             | 79  | 10   | 23 | 4   | 369.2                                    | 313.2             | 79  | 10   | 13 | 4   |
| 214   | Metobromuron         | 6.62  | Positive   | 259.0                                    | 170.0             | 76  | 10   | 25 | 4   | 259.0                                    | 148.2             | 76  | 10   | 21 | 4   |
| 215   | Metolcarb            | 5.20  | Positive   | 166.1                                    | 109.1             | 41  | 10   | 17 | 10  | 166.1                                    | 91.1              | 41  | 10   | 33 | 6   |

| No.   | Compound Name       | tr    | Ionization | Quantitation ion MRM transition profiles |                   |      |     |     |     | Confirmation ion MRM transition profiles |                   |      |     |     |     |
|-------|---------------------|-------|------------|------------------------------------------|-------------------|------|-----|-----|-----|------------------------------------------|-------------------|------|-----|-----|-----|
|       |                     |       |            | Precursor ion (m/z)                      | Product ion (m/z) | DP   | EP  | CE  | CXP | Precursor ion (m/z)                      | Product ion (m/z) | DP   | EP  | CE  | CXP |
| 216   | Metominostrobin (Z) | 6.70  | Positive   | 285.1                                    | 196.1             | 66   | 10  | 19  | 10  | 285.1                                    | 77.1              | 66   | 10  | 53  | 8   |
| 217   | Metominostrobin (E) | 7.12  | Positive   | 285.1                                    | 194.1             | 106  | 10  | 27  | 8   | 285.1                                    | 196.1             | 106  | 10  | 21  | 12  |
| 218   | Metrafenon          | 10.60 | Positive   | 409.1                                    | 209.1             | 46   | 10  | 19  | 14  | 409.1                                    | 226.9             | 46   | 10  | 29  | 14  |
| 219-1 | Mevinphos_1         | 4.07  | Positive   | 225.0                                    | 127.0             | 66   | 10  | 21  | 12  | 225.0                                    | 193.0             | 66   | 10  | 11  | 16  |
| 219-2 | Mevinphos_2         | 4.46  | Positive   | 225.0                                    | 127.0             | 66   | 10  | 21  | 12  | 225.0                                    | 193.0             | 66   | 10  | 11  | 16  |
| 220   | Monocrotophos       | 3.63  | Positive   | 224.1                                    | 127.0             | 86   | 10  | 21  | 4   | 224.0                                    | 98.0              | 86   | 10  | 17  | 4   |
| 221   | Monolinuron         | 6.23  | Positive   | 215.1                                    | 126.0             | 90   | 10  | 24  | 10  | 215.1                                    | 99.1              | 90   | 10  | 47  | 10  |
| 222   | Myclobutanil        | 8.49  | Positive   | 289.1                                    | 70.1              | 69   | 10  | 33  | 4   | 289.1                                    | 125.2             | 69   | 10  | 39  | 4   |
| 223   | Napropamide         | 9.16  | Positive   | 272.1                                    | 129.3             | 71   | 10  | 21  | 4   | 272.0                                    | 171.0             | 71   | 10  | 23  | 4   |
| 224   | Neburon             | 9.64  | Positive   | 275.0                                    | 88.0              | 111  | 10  | 21  | 10  | 275.0                                    | 114.1             | 111  | 10  | 21  | 8   |
| 225   | Nicosulfuron        | 5.26  | Positive   | 411.1                                    | 182.1             | 81   | 10  | 25  | 4   | 411.0                                    | 213.0             | 101  | 10  | 23  | 4   |
| 226   | Nitenpyram          | 3.50  | Positive   | 271.0                                    | 225.1             | 86   | 10  | 15  | 6   | 271.0                                    | 126.0             | 86   | 10  | 35  | 12  |
| 227   | Norflurazon         | 7.00  | Positive   | 304.1                                    | 284.1             | 90   | 10  | 32  | 10  | 304.1                                    | 160.0             | 90   | 10  | 40  | 10  |
| 228   | Noruron (Norea)     | 8.04  | Positive   | 223.2                                    | 67.1              | 146  | 10  | 47  | 6   | 223.2                                    | 93.0              | 146  | 10  | 33  | 8   |
| 229   | Novaluron           | 10.94 | Negative   | 490.8                                    | 304.9             | -145 | -10 | -22 | -27 | 490.8                                    | 85.0              | -145 | -10 | -78 | -7  |
| 230   | Nuarimol            | 7.82  | Positive   | 315.1                                    | 252.1             | 101  | 10  | 31  | 22  | 315.1                                    | 81.1              | 101  | 10  | 49  | 8   |
| 231   | Ofurace             | 5.54  | Positive   | 282.1                                    | 254.0             | 84   | 10  | 17  | 4   | 282.0                                    | 160.0             | 86   | 10  | 29  | 4   |
| 232   | Omethoate           | 3.32  | Positive   | 214.0                                    | 182.9             | 66   | 10  | 15  | 14  | 214.0                                    | 125.0             | 66   | 10  | 29  | 10  |
| 233   | Oxadiazon           | 11.83 | Positive   | 362.1                                    | 303.1             | 61   | 10  | 25  | 22  | 362.1                                    | 219.9             | 61   | 10  | 33  | 8   |
| 234   | Oxadixyl            | 4.85  | Positive   | 279.2                                    | 219.2             | 66   | 10  | 15  | 4   | 279.2                                    | 132.1             | 66   | 10  | 41  | 4   |
| 235   | Oxamyl              | 3.47  | Positive   | 237.1                                    | 72.0              | 63   | 10  | 25  | 4   | 237.1                                    | 90.1              | 63   | 10  | 11  | 4   |
| 236   | Oxaziclomefone      | 11.37 | Positive   | 376.1                                    | 190.1             | 91   | 10  | 19  | 14  | 376.1                                    | 161.1             | 91   | 10  | 37  | 10  |
| 237   | Paclobutrazole      | 8.31  | Positive   | 294.1                                    | 70.1              | 51   | 10  | 23  | 8   | 294.1                                    | 125.0             | 51   | 10  | 53  | 10  |
| 238   | Penconazole         | 9.86  | Positive   | 284.1                                    | 158.9             | 81   | 10  | 39  | 4   | 284.1                                    | 70.0              | 81   | 10  | 31  | 4   |
| 239   | Pencycuron          | 10.60 | Positive   | 329.1                                    | 125.1             | 71   | 10  | 39  | 10  | 329.1                                    | 89.1              | 71   | 10  | 89  | 8   |
| 240   | Penoxsulam          | 5.85  | Positive   | 484.0                                    | 195.0             | 186  | 10  | 37  | 14  | 484.0                                    | 164.2             | 186  | 10  | 43  | 12  |
| 241   | Pentoxaone          | 11.44 | Positive   | 354.3                                    | 286.0             | 126  | 10  | 17  | 22  | 354.3                                    | 186.0             | 126  | 10  | 37  | 14  |
| 242   | Phenthoate          | 9.71  | Positive   | 321.0                                    | 163.1             | 76   | 10  | 17  | 4   | 321.0                                    | 79.0              | 76   | 10  | 51  | 4   |
| 243   | Phosalone           | 10.46 | Positive   | 368.0                                    | 182.1             | 90   | 10  | 21  | 10  | 370.0                                    | 184.1             | 90   | 10  | 21  | 10  |
| 244   | Phosfolan           | 4.66  | Positive   | 256.0                                    | 139.8             | 86   | 10  | 35  | 12  | 256.0                                    | 227.9             | 86   | 10  | 17  | 8   |
| 245   | Phosphamidon        | 4.93  | Positive   | 300.1                                    | 174.0             | 126  | 10  | 19  | 12  | 300.1                                    | 127.0             | 126  | 10  | 31  | 10  |
| 246   | Phoxim              | 10.32 | Positive   | 299.0                                    | 129.1             | 66   | 10  | 17  | 4   | 299.0                                    | 77.0              | 66   | 10  | 41  | 4   |
| 247   | Picolinafen         | 11.60 | Positive   | 377.1                                    | 238.1             | 90   | 10  | 38  | 10  | 377.1                                    | 145.1             | 90   | 10  | 70  | 10  |
| 248   | Picoxystrobin       | 9.47  | Positive   | 368.1                                    | 145.1             | 90   | 10  | 30  | 10  | 368.1                                    | 205.1             | 90   | 10  | 14  | 10  |
| 249   | Piperonyl butoxide  | 11.92 | Positive   | 356.3                                    | 177.1             | 90   | 10  | 17  | 10  | 356.3                                    | 119.0             | 90   | 10  | 49  | 10  |
| 250   | Piperophos          | 10.88 | Positive   | 354.1                                    | 171.1             | 64   | 10  | 29  | 4   | 354.1                                    | 255.0             | 64   | 10  | 19  | 4   |
| 251   | Pirimicarb          | 5.68  | Positive   | 239.1                                    | 72.1              | 56   | 10  | 31  | 4   | 239.2                                    | 182.2             | 73   | 10  | 21  | 4   |



| No. | Compound Name           | tr    | Ionization | Quantitation ion MRM transition profiles |                   |     |     |    |     | Confirmation ion MRM transition profiles |                   |     |     |     |     |
|-----|-------------------------|-------|------------|------------------------------------------|-------------------|-----|-----|----|-----|------------------------------------------|-------------------|-----|-----|-----|-----|
|     |                         |       |            | Precursor ion (m/z)                      | Product ion (m/z) | DP  | EP  | CE | CXP | Precursor ion (m/z)                      | Product ion (m/z) | DP  | EP  | CE  | CXP |
| 252 | Pirimicarb-desmethyl    | 4.06  | Positive   | 225.1                                    | 72.2              | 96  | 10  | 41 | 6   | 225.1                                    | 168.2             | 96  | 10  | 19  | 14  |
| 253 | Pirimiphos-ethyl        | 11.83 | Positive   | 334.1                                    | 198.1             | 86  | 10  | 31 | 14  | 334.1                                    | 182.2             | 86  | 10  | 29  | 14  |
| 254 | Pirimiphos-methyl       | 10.56 | Positive   | 306.1                                    | 164.1             | 27  | 10  | 29 | 4   | 306.1                                    | 108.0             | 27  | 10  | 43  | 4   |
| 255 | Probenazole             | 5.09  | Positive   | 224.1                                    | 41.0              | 61  | 10  | 21 | 4   | 224.1                                    | 184.1             | 61  | 10  | 20  | 4   |
| 256 | Prochloraz              | 10.25 | Positive   | 376.1                                    | 308.0             | 90  | 10  | 16 | 10  | 376.1                                    | 266.0             | 90  | 10  | 23  | 10  |
| 257 | Profenofos              | 11.41 | Positive   | 372.9                                    | 302.9             | 86  | 10  | 25 | 4   | 373.0                                    | 97.0              | 76  | 10  | 43  | 4   |
| 258 | Promecarb               | 8.25  | Positive   | 208.1                                    | 109.1             | 81  | 10  | 21 | 4   | 208.1                                    | 151.1             | 81  | 10  | 13  | 16  |
| 259 | Prometryn               | 8.47  | Positive   | 242.1                                    | 158.1             | 90  | 10  | 31 | 10  | 242.1                                    | 200.2             | 90  | 10  | 25  | 10  |
| 260 | Pronamide (Propyzamide) | 8.49  | Positive   | 256.1                                    | 189.9             | 90  | 10  | 20 | 10  | 256.1                                    | 172.9             | 90  | 10  | 30  | 10  |
| 261 | Propachlor              | 6.89  | Positive   | 212.1                                    | 170.1             | 90  | 10  | 20 | 10  | 212.1                                    | 94.0              | 90  | 10  | 35  | 10  |
| 262 | Propamocarb             | 3.32  | Positive   | 189.2                                    | 102.0             | 51  | 10  | 25 | 10  | 189.2                                    | 144.1             | 51  | 10  | 17  | 8   |
| 263 | Propanil                | 7.94  | Positive   | 218.0                                    | 162.0             | 82  | 10  | 21 | 4   | 218.0                                    | 127.1             | 82  | 10  | 37  | 4   |
| 264 | Propaquizafop           | 11.70 | Positive   | 444.1                                    | 100.0             | 116 | 10  | 23 | 8   | 444.1                                    | 299.0             | 116 | 10  | 31  | 18  |
| 265 | Propargite              | 12.44 | Positive   | 368.2                                    | 231.1             | 51  | 10  | 15 | 16  | 368.2                                    | 175.1             | 51  | 10  | 23  | 14  |
| 266 | Propazine               | 7.92  | Positive   | 230.2                                    | 146.0             | 90  | 10  | 31 | 10  | 230.2                                    | 188.1             | 90  | 10  | 25  | 10  |
| 267 | Propiconazole           | 10.13 | Positive   | 342.2                                    | 159.0             | 90  | 10  | 40 | 10  | 342.2                                    | 69.1              | 90  | 10  | 25  | 10  |
| 268 | Propoxur                | 5.56  | Positive   | 210.1                                    | 111.1             | 58  | 10  | 19 | 4   | 210.1                                    | 168.1             | 58  | 10  | 11  | 4   |
| 269 | Proquazid               | 13.22 | Positive   | 373.0                                    | 331.0             | 166 | 10  | 21 | 10  | 373.0                                    | 289.1             | 166 | 10  | 33  | 14  |
| 270 | Prosulfocarb            | 11.34 | Positive   | 252.1                                    | 91.1              | 131 | 10  | 33 | 8   | 252.1                                    | 65.1              | 131 | 10  | 75  | 10  |
| 271 | Prothioconazole-desthio | 9.33  | Positive   | 312.1                                    | 70.0              | 86  | 10  | 27 | 8   | 312.1                                    | 125.0             | 86  | 10  | 47  | 10  |
| 272 | Pydiflumetofen          | 10.66 | Positive   | 426.1                                    | 192.9             | 126 | 10  | 49 | 14  | 426.1                                    | 123.1             | 126 | 10  | 111 | 10  |
| 273 | Pyracarbolid            | 5.81  | Positive   | 218.2                                    | 125.1             | 90  | 10  | 25 | 10  | 218.2                                    | 97.2              | 90  | 10  | 36  | 10  |
| 274 | Pyraclofos              | 10.41 | Positive   | 361.0                                    | 257.0             | 91  | 10  | 30 | 4   | 361.1                                    | 138.1             | 91  | 10  | 49  | 4   |
| 275 | Pyraclonil              | 6.20  | Positive   | 315.1                                    | 169.0             | 141 | 10  | 43 | 4   | 315.1                                    | 241.2             | 141 | 10  | 27  | 4   |
| 276 | Pyraclostrobin          | 10.28 | Positive   | 388.1                                    | 194.0             | 59  | 10  | 19 | 4   | 388.0                                    | 163.0             | 51  | 10  | 29  | 4   |
| 277 | Pyraflufen-ethyl        | 9.94  | Positive   | 413.0                                    | 339.1             | 76  | 10  | 25 | 14  | 413.0                                    | 252.9             | 76  | 10  | 47  | 10  |
| 278 | Pyraziflumid            | 8.86  | Positive   | 380.0                                    | 146.9             | 181 | 10  | 41 | 6   | 380.0                                    | 68.9              | 181 | 10  | 117 | 32  |
| 279 | Pyrazolate              | 10.54 | Positive   | 439.0                                    | 173.1             | 46  | 9   | 20 | 27  | 439.0                                    | 155.2             | 46  | 9   | 20  | 27  |
| 280 | Pyrazophos              | 10.52 | Positive   | 374.1                                    | 222.1             | 81  | 10  | 29 | 4   | 374.1                                    | 194.0             | 101 | 10  | 43  | 4   |
| 281 | Pyribenzoxim            | 11.50 | Positive   | 610.0                                    | 413.2             | 11  | 5.5 | 22 | 23  | 610.0                                    | 180.1             | 11  | 5.5 | 22  | 39  |
| 282 | Pyributicarb            | 12.05 | Positive   | 331.1                                    | 181.1             | 25  | 10  | 21 | 4   | 331.1                                    | 108.0             | 25  | 10  | 40  | 4   |
| 283 | Pyridaben               | 13.28 | Positive   | 365.1                                    | 309.1             | 64  | 10  | 19 | 4   | 365.0                                    | 147.0             | 61  | 10  | 31  | 4   |
| 284 | Pyridalyl               | 15.29 | Positive   | 492.0                                    | 109.0             | 141 | 10  | 37 | 8   | 492.0                                    | 111.1             | 141 | 10  | 37  | 12  |
| 285 | Pyridaphenthion         | 8.55  | Positive   | 341.0                                    | 189.0             | 86  | 10  | 29 | 4   | 341.0                                    | 205.0             | 26  | 10  | 35  | 4   |
| 286 | Pyridate                | 13.88 | Positive   | 379.1                                    | 207.0             | 86  | 10  | 23 | 14  | 379.1                                    | 351.1             | 86  | 10  | 13  | 52  |
| 287 | Pyrifluquinazon         | 8.60  | Positive   | 465.1                                    | 423.1             | 141 | 10  | 29 | 14  | 465.1                                    | 92.2              | 141 | 10  | 69  | 6   |
| 288 | Pyrifthalid             | 7.50  | Positive   | 319.1                                    | 139.0             | 161 | 10  | 39 | 10  | 319.1                                    | 179.0             | 161 | 10  | 41  | 14  |

| No. | Compound Name                | tr    | Ionization | Quantitation ion MRM transition profiles |                   |     |     |     |     | Confirmation ion MRM transition profiles |                   |     |     |     |     |
|-----|------------------------------|-------|------------|------------------------------------------|-------------------|-----|-----|-----|-----|------------------------------------------|-------------------|-----|-----|-----|-----|
|     |                              |       |            | Precursor ion (m/z)                      | Product ion (m/z) | DP  | EP  | CE  | CXP | Precursor ion (m/z)                      | Product ion (m/z) | DP  | EP  | CE  | CXP |
| 289 | Pyrimethanil                 | 7.83  | Positive   | 200.0                                    | 107.0             | 91  | 10  | 33  | 4   | 200.0                                    | 82.0              | 91  | 10  | 35  | 4   |
| 290 | Pyrimidifen                  | 11.74 | Positive   | 378.2                                    | 184.1             | 166 | 10  | 31  | 14  | 378.2                                    | 157.1             | 166 | 10  | 53  | 14  |
| 291 | Pyriminobac (E)              | 8.22  | Positive   | 362.2                                    | 330.1             | 101 | 10  | 19  | 14  | 362.2                                    | 284.1             | 101 | 10  | 39  | 16  |
| 292 | Pyriminobac (Z)              | 7.56  | Positive   | 362.2                                    | 330.2             | 86  | 10  | 21  | 22  | 362.2                                    | 244.0             | 96  | 10  | 37  | 18  |
| 293 | Pyrimisulfan                 | 7.07  | Positive   | 420.1                                    | 370.1             | 46  | 10  | 25  | 32  | 420.1                                    | 255.2             | 46  | 10  | 37  | 4   |
| 294 | Pyriproxyfen                 | 12.08 | Positive   | 322.1                                    | 96.2              | 54  | 10  | 21  | 4   | 322.0                                    | 185.0             | 51  | 10  | 29  | 4   |
| 295 | Pyroquilon                   | 5.44  | Positive   | 174.1                                    | 132.1             | 51  | 10  | 31  | 12  | 174.1                                    | 117.2             | 51  | 10  | 45  | 10  |
| 296 | Quinalphos                   | 9.81  | Positive   | 299.0                                    | 97.1              | 36  | 10  | 33  | 4   | 299.0                                    | 163.0             | 61  | 10  | 29  | 4   |
| 297 | Quinoclamine                 | 5.27  | Positive   | 208.1                                    | 105.0             | 191 | 10  | 33  | 6   | 208.1                                    | 89.0              | 191 | 10  | 51  | 6   |
| 298 | Quizalofop-ethyl             | 11.49 | Positive   | 373.1                                    | 298.9             | 94  | 10  | 25  | 4   | 373.0                                    | 271.0             | 116 | 10  | 33  | 4   |
| 299 | Saflufenacil                 | 7.49  | Positive   | 501.1                                    | 197.9             | 111 | 10  | 59  | 14  | 501.1                                    | 349.1             | 111 | 10  | 35  | 32  |
| 300 | Sethoxydim A                 | 11.76 | Positive   | 328.1                                    | 178.2             | 61  | 10  | 27  | 4   | 328.1                                    | 180.2             | 61  | 10  | 33  | 4   |
| 301 | Simazine                     | 5.66  | Positive   | 202.2                                    | 132.2             | 90  | 10  | 26  | 10  | 202.2                                    | 103.9             | 90  | 10  | 33  | 10  |
| 302 | Simeconazole                 | 9.01  | Positive   | 294.1                                    | 70.1              | 90  | 10  | 22  | 10  | 294.1                                    | 135.1             | 90  | 10  | 29  | 10  |
| 303 | Simetryn                     | 6.10  | Positive   | 214.1                                    | 124.0             | 90  | 10  | 27  | 10  | 214.1                                    | 144.0             | 90  | 10  | 27  | 10  |
| 304 | Spinetoram (J)               | 10.58 | Positive   | 748.4                                    | 142.1             | 91  | 10  | 39  | 12  | 748.4                                    | 98.2              | 91  | 10  | 89  | 6   |
| 305 | Spinetoram (L)               | 11.12 | Positive   | 760.4                                    | 142.1             | 71  | 10  | 37  | 12  | 760.4                                    | 98.2              | 71  | 10  | 97  | 12  |
| 306 | Spinosyn A                   | 9.95  | Positive   | 732.4                                    | 142.1             | 86  | 10  | 37  | 12  | 732.4                                    | 98.2              | 86  | 10  | 95  | 6   |
| 307 | Spinosyn D                   | 10.49 | Positive   | 746.4                                    | 142.2             | 81  | 10  | 39  | 6   | 746.4                                    | 98.2              | 81  | 10  | 97  | 8   |
| 308 | Spirodiclofen                | 12.79 | Positive   | 411.1                                    | 313.0             | 121 | 10  | 17  | 12  | 411.1                                    | 71.2              | 121 | 10  | 27  | 6   |
| 309 | Spirotetramat                | 4.23  | Positive   | 278.3                                    | 174.0             | 131 | 10  | 27  | 22  | 278.3                                    | 154.0             | 106 | 10  | 27  | 22  |
| 310 | Spirotetramat-enol           | 6.24  | Positive   | 302.1                                    | 216.2             | 56  | 10  | 37  | 6   | 302.1                                    | 270.2             | 56  | 10  | 29  | 10  |
| 311 | Spirotetramat-enol-glucoside | 3.68  | Positive   | 464.1                                    | 302.2             | 76  | 10  | 27  | 14  | 464.1                                    | 270.0             | 76  | 10  | 43  | 22  |
| 312 | Spirotetramat-ketohydroxy    | 7.06  | Positive   | 318.1                                    | 214.2             | 91  | 10  | 37  | 18  | 318.1                                    | 268.2             | 91  | 10  | 27  | 10  |
| 313 | Spirotetramat-monohydroxy    | 5.43  | Positive   | 304.2                                    | 254.1             | 156 | 10  | 25  | 20  | 304.2                                    | 211.0             | 136 | 10  | 31  | 16  |
| 314 | Spiroxamine                  | 7.50  | Positive   | 298.2                                    | 144.1             | 90  | 10  | 28  | 10  | 298.2                                    | 100.1             | 90  | 10  | 40  | 10  |
| 315 | Sulfentrazone                | 5.75  | Positive   | 404.0                                    | 307.0             | 86  | 10  | 35  | 12  | 404.0                                    | 272.9             | 86  | 10  | 47  | 10  |
| 316 | Sulfotep                     | 9.88  | Positive   | 323.1                                    | 115.0             | 90  | 10  | 40  | 10  | 323.1                                    | 171.1             | 90  | 10  | 20  | 10  |
| 317 | Sulfoxaflo                   | 4.23  | Negative   | 275.9                                    | 213.0             | -75 | -10 | -22 | -15 | 275.9                                    | 212.0             | -75 | -10 | -22 | -25 |
| 318 | Sulprofos                    | 12.32 | Positive   | 323.1                                    | 218.9             | 90  | 10  | 23  | 10  | 323.1                                    | 139.2             | 90  | 10  | 40  | 10  |
| 319 | TCMTB                        | 7.88  | Positive   | 239.0                                    | 180.0             | 90  | 10  | 17  | 10  | 239.0                                    | 136.0             | 90  | 10  | 36  | 10  |
| 320 | Tebuconazole                 | 9.94  | Positive   | 308.1                                    | 70.0              | 66  | 10  | 27  | 8   | 308.1                                    | 125.1             | 66  | 10  | 55  | 10  |
| 321 | Tebufenozide                 | 9.48  | Positive   | 353.2                                    | 133.2             | 81  | 10  | 23  | 4   | 353.2                                    | 296.9             | 81  | 10  | 15  | 4   |
| 322 | Tebufenpyrad                 | 11.61 | Positive   | 334.2                                    | 117.0             | 71  | 10  | 47  | 4   | 334.0                                    | 145.0             | 91  | 10  | 37  | 4   |
| 323 | Tebuthiuron                  | 5.78  | Positive   | 229.1                                    | 172.1             | 91  | 10  | 23  | 20  | 229.1                                    | 116.2             | 91  | 10  | 35  | 8   |
| 324 | Teflubenzuron                | 11.74 | Negative   | 378.8                                    | 338.9             | -55 | -10 | -18 | -23 | 378.8                                    | 195.9             | -55 | -10 | -34 | -13 |
| 325 | Tepraloxydim                 | 8.90  | Positive   | 342.1                                    | 250.2             | 101 | 10  | 21  | 18  | 342.1                                    | 166.2             | 101 | 10  | 25  | 12  |

| No. | Compound Name         | tr    | Ionization | Quantitation ion MRM transition profiles |                   |     |     |     |     | Confirmation ion MRM transition profiles |                   |     |     |     |     |
|-----|-----------------------|-------|------------|------------------------------------------|-------------------|-----|-----|-----|-----|------------------------------------------|-------------------|-----|-----|-----|-----|
|     |                       |       |            | Precursor ion (m/z)                      | Product ion (m/z) | DP  | EP  | CE  | CXP | Precursor ion (m/z)                      | Product ion (m/z) | DP  | EP  | CE  | CXP |
| 326 | Terbutylazine         | 8.11  | Positive   | 230.1                                    | 174.1             | 81  | 10  | 23  | 4   | 230.1                                    | 104.1             | 86  | 10  | 41  | 4   |
| 327 | Terbutryn             | 8.60  | Positive   | 242.1                                    | 186.2             | 90  | 10  | 26  | 10  | 242.1                                    | 96.0              | 90  | 10  | 40  | 10  |
| 328 | Tetrachlorvinphos     | 9.62  | Positive   | 367.1                                    | 126.9             | 90  | 10  | 20  | 10  | 367.1                                    | 206.0             | 90  | 10  | 51  | 10  |
| 329 | Tetraconazole         | 8.99  | Positive   | 372.0                                    | 159.0             | 81  | 10  | 39  | 4   | 372.0                                    | 70.0              | 76  | 10  | 47  | 4   |
| 330 | Thenylchlor           | 9.02  | Positive   | 324.1                                    | 127.0             | 66  | 10  | 27  | 12  | 324.1                                    | 97.1              | 66  | 10  | 57  | 8   |
| 331 | Thiabendazole         | 4.05  | Positive   | 202.0                                    | 175.1             | 79  | 10  | 35  | 4   | 202.0                                    | 131.1             | 79  | 10  | 43  | 4   |
| 332 | Thiacloprid           | 4.28  | Positive   | 253.1                                    | 126.1             | 56  | 10  | 29  | 12  | 253.1                                    | 90.1              | 56  | 10  | 51  | 8   |
| 333 | Thiamethoxam          | 3.61  | Positive   | 292.0                                    | 211.0             | 74  | 10  | 17  | 4   | 292.0                                    | 181.0             | 96  | 10  | 31  | 4   |
| 334 | Thiazopyr             | 9.81  | Positive   | 397.1                                    | 377.1             | 151 | 10  | 31  | 16  | 397.1                                    | 335.1             | 151 | 10  | 41  | 14  |
| 335 | Thidiazuron           | 5.50  | Negative   | 219.0                                    | 100.0             | -25 | -10 | -16 | -9  | 219.0                                    | 70.9              | -25 | -10 | -54 | -11 |
| 336 | Thifensulfuron-methyl | 5.11  | Negative   | 385.9                                    | 139.0             | -80 | -10 | -28 | -1  | 385.9                                    | 107.0             | -80 | -10 | -74 | -7  |
| 337 | Thifluzamide          | 9.21  | Positive   | 526.9                                    | 147.9             | 90  | 10  | 43  | 10  | 526.9                                    | 486.8             | 90  | 10  | 38  | 10  |
| 338 | Thiobencarb           | 10.67 | Positive   | 258.1                                    | 125.0             | 91  | 10  | 25  | 4   | 258.1                                    | 89.0              | 69  | 10  | 67  | 4   |
| 339 | Thionazin             | 6.89  | Positive   | 249.0                                    | 96.9              | 90  | 10  | 34  | 10  | 249.0                                    | 192.9             | 90  | 10  | 20  | 10  |
| 340 | Tiadinil              | 8.72  | Negative   | 265.9                                    | 70.9              | -60 | -10 | -18 | -11 | 265.9                                    | 237.8             | -60 | -10 | -18 | -13 |
| 341 | Tolfenpyrad           | 11.72 | Positive   | 384.2                                    | 197.3             | 90  | 10  | 35  | 10  | 384.2                                    | 154.2             | 90  | 10  | 55  | 10  |
| 342 | Triadimefon           | 8.52  | Positive   | 294.2                                    | 197.1             | 96  | 10  | 21  | 14  | 294.2                                    | 69.1              | 96  | 10  | 27  | 8   |
| 343 | Triazophos            | 8.67  | Positive   | 314.0                                    | 162.0             | 76  | 10  | 25  | 4   | 314.0                                    | 119.1             | 71  | 10  | 47  | 4   |
| 344 | Tricyclazole          | 4.59  | Positive   | 190.0                                    | 163.1             | 89  | 10  | 31  | 4   | 190.0                                    | 136.0             | 91  | 10  | 37  | 4   |
| 345 | Trifloxystrobin       | 10.90 | Positive   | 409.1                                    | 186.1             | 59  | 10  | 23  | 4   | 409.0                                    | 206.0             | 46  | 10  | 21  | 4   |
| 346 | Triflumizole          | 10.99 | Positive   | 346.0                                    | 278.0             | 56  | 10  | 17  | 4   | 346.0                                    | 72.9              | 56  | 10  | 23  | 4   |
| 347 | Triflumuron           | 10.31 | Positive   | 359.1                                    | 156.2             | 71  | 10  | 23  | 4   | 359.1                                    | 139.0             | 71  | 10  | 43  | 4   |
| 348 | Trimethacarb          | 7.03  | Positive   | 194.2                                    | 137.0             | 81  | 10  | 17  | 10  | 194.2                                    | 122.1             | 81  | 10  | 37  | 10  |
| 349 | Triticonazole         | 9.06  | Positive   | 318.1                                    | 70.0              | 101 | 10  | 21  | 8   | 318.1                                    | 125.1             | 101 | 10  | 45  | 10  |
| 350 | Uniconazole           | 9.39  | Positive   | 292.1                                    | 70.1              | 79  | 10  | 37  | 4   | 292.1                                    | 125.0             | 70  | 10  | 51  | 4   |
| 351 | Vamidothion           | 3.99  | Positive   | 288.0                                    | 145.9             | 56  | 10  | 17  | 4   | 288.0                                    | 118.0             | 56  | 10  | 31  | 4   |
| 352 | XMC                   | 6.29  | Positive   | 180.1                                    | 123.0             | 56  | 10  | 19  | 14  | 180.1                                    | 107.0             | 56  | 10  | 49  | 8   |
| 353 | Zoxamide              | 10.16 | Positive   | 336.0                                    | 187.0             | 90  | 10  | 30  | 10  | 338.0                                    | 189.0             | 90  | 10  | 30  | 10  |

**Table S2.** Recovery results of representative pesticides that showed a difference in recovery rate depending on number of acetonitrile-hexane partition rounds ( $N = 1, 2,$  and  $3$ ). Each partitioning round was conducted with acetonitrile extraction using QuEChERS original salts ( $\text{NaCl}$  and  $\text{MgSO}_4$ ) and dSPE cleanup using PSA sorbent.

| Compound name    | Classification  | Recovery, % (RSD, %) |             |             |
|------------------|-----------------|----------------------|-------------|-------------|
|                  |                 | $N = 1$              | $N = 2$     | $N = 3$     |
| Ametryn          | Triazine        | 60.1 (0.7)           | 78.7 (5.8)  | 80.8 (3.6)  |
| Aspon            | Organophosphate | 59.8 (1.5)           | 81.2 (2.3)  | 85.7 (1.6)  |
| Buprofezin       | Others          | 57.4 (1.1)           | 78.2 (4.7)  | 85.4 (2.6)  |
| Cadusafos        | Organophosphate | 65.2 (5.8)           | 81.2 (4.4)  | 86.0 (4.6)  |
| Chlorpyrifos     | Organophosphate | 59.4 (1.6)           | 75.2 (4.6)  | 82.7 (3.5)  |
| Diazinon         | Organophosphate | 66.8 (5.3)           | 73.9 (1.2)  | 87.8 (2.4)  |
| Dimepiperate     | Unclassified    | 55.2 (3.6)           | 68.0 (15.8) | 72.9 (12.6) |
| Dimethametryn    | Triazine        | 43.9 (1.3)           | 66.7 (2.6)  | 88.9 (5.2)  |
| Esprocarb        | Carbamate       | 49.5 (3.2)           | 64.0 (5.0)  | 90.1 (10.6) |
| Etoxazole        | Unclassified    | 64.2 (1.6)           | 78.0 (2.0)  | 81.4 (2.3)  |
| Fenhexamid       | Others          | 68.2 (3.8)           | 79.7 (10.3) | 80.7 (2.6)  |
| Fenpropathrin    | Pyrethroid      | 69.0 (2.0)           | 82.8 (8.0)  | 90.2 (1.5)  |
| Fenpropimorph    | Others          | 19.5 (1.5)           | 63.0 (1.2)  | 75.7 (2.1)  |
| Hexythiazox      | Others          | 62.5 (2.9)           | 73.7 (2.6)  | 74.2 (1.4)  |
| Mepanipyrim      | Others          | 61.0 (5.4)           | 72.6 (7.0)  | 86.5 (4.1)  |
| Pirimiphos-ethyl | Organophosphate | 58.0 (4.0)           | 78.7 (2.2)  | 82.5 (5.2)  |
| Prometryn        | Triazine        | 45.9 (1.8)           | 68.5 (3.7)  | 74.2 (10.9) |
| Propazine        | Triazine        | 64.5 (5.5)           | 74.2 (4.5)  | 87.6 (3.1)  |
| Pyridaben        | Unclassified    | 60.7 (2.0)           | 69.7 (2.3)  | 73.0 (2.2)  |
| Pyridate         | Others          | 52.6 (2.7)           | 76.6 (8.2)  | 82.9 (4.8)  |
| Pyrimidifen      | Others          | 55.0 (2.0)           | 66.1 (2.3)  | 72.2 (0.2)  |
| Spirodiclofen    | Others          | 68.1 (1.9)           | 79.7 (2.1)  | 84.5 (0.9)  |
| Sulprofos        | Organophosphate | 64.6 (2.0)           | 76.0 (1.7)  | 79.6 (1.4)  |
| Tebufenpyrad     | Others          | 62.2 (2.4)           | 80.9 (1.9)  | 89.0 (6.5)  |
| Terbutryn        | Triazine        | 50.5 (4.7)           | 58.5 (1.9)  | 78.4 (1.7)  |
| Thiabendazole    | Others          | 68.7 (1.5)           | 74.8 (7.0)  | 78.7 (2.9)  |

**Table S3.** Comparison of four QuEChERS extraction combinations and distribution of recovery results for 353 target pesticides. Each extraction was conducted with acetonitrile-hexane partitioning ( $N = 3$ ) followed by dSPE cleanup using PSA.

| Recovery (%)    | RSD (%) | No. of pesticides under detailed sample preparation conditions |                                           |                                      |                              |
|-----------------|---------|----------------------------------------------------------------|-------------------------------------------|--------------------------------------|------------------------------|
|                 |         | QuEChERS EN 15662 salts <sup>1</sup>                           |                                           | QuEChERS Original salts <sup>2</sup> |                              |
|                 |         | MeCN <sup>3</sup><br>(12.5 mL)                                 | 0.1% FA <sup>4</sup> in MeCN<br>(12.5 mL) | MeCN<br>(12.5 mL)                    | 0.1% FA in MeCN<br>(12.5 mL) |
| <10             | >0      | 2 (0.6)                                                        | 7 (2.0)                                   | 7 (2.0)                              | 6 (1.7)                      |
| 10 to 30        | ≤20     | 1 (0.3)                                                        | 8 (2.3)                                   | 9 (2.5)                              | 5 (1.4)                      |
|                 | >20     | 6 (1.7)                                                        | 1 (0.3)                                   | 1 (0.3)                              | 5 (1.4)                      |
| 30 to 70        | ≤20     | 17 (4.8)                                                       | 27 (7.6)                                  | 30 (8.5)                             | 20 (5.7)                     |
|                 | >20     | 15 (4.2)                                                       | 4 (1.1)                                   | 1 (0.3)                              | 3 (0.8)                      |
| 70 to 120       | ≤20     | 300 (85.0)                                                     | 289 (81.9)                                | 294 (83.3)                           | 295 (83.6)                   |
|                 | >20     | 10 (2.8)                                                       | 15 (4.2)                                  | 8 (2.3)                              | 12 (3.4)                     |
| >120            | ≤20     | 2 (0.6)                                                        | 2 (0.6)                                   | 3 (0.8)                              | 6 (1.7)                      |
|                 | >20     | 0 (0.0)                                                        | 0 (0.0)                                   | 0 (0.0)                              | 0 (0.0)                      |
| nd <sup>5</sup> |         | 0 (0.0)                                                        | 0 (0.0)                                   | 0 (0.0)                              | 1 (0.3)                      |
| Sum             |         | 353 (100)                                                      | 353 (100)                                 | 353 (100)                            | 353 (100)                    |

<sup>1</sup> NaCl (1 g), MgSO<sub>4</sub> (4 g), Na<sub>3</sub>Citrate · 2H<sub>2</sub>O (1 g), Na<sub>2</sub>HCitrate · 1.5H<sub>2</sub>O (0.5 g).

<sup>2</sup> NaCl (1 g), MgSO<sub>4</sub> (4 g).

<sup>3</sup> Acetonitrile.

<sup>4</sup> Formic acid.

<sup>5</sup> Not detected.

**Table S4.** Recovery results of representative pesticides that showed different recovery rate depending on dSPE sorbent combination (PSA+C18, PSA, and C18). Each dSPE cleanup was conducted with acetonitrile extraction using EN 15662 salts followed by acetonitrile-hexane partitioning ( $N = 3$ ).

| Compound name                | Classification    | Recovery, % (RSD, %) |              |             |
|------------------------------|-------------------|----------------------|--------------|-------------|
|                              |                   | PSA+C18              | PSA          | C18         |
| Azimsulfuron                 | Sulfonylurea      | 37.7 (1.9)           | 42.5 (17.6)  | 91.5 (2.8)  |
| Bensulfuron-methyl           | Sulfonylurea      | 39.0 (2.9)           | 47.3 (19.5)  | 89.5 (3.1)  |
| Chlorimuron-ethyl            | Sulfonylurea      | 28.1 (1.5)           | 39.5 (15.4)  | 79.6 (3.7)  |
| Chlorsulfuron                | Sulfonylurea      | 22.1 (2.2)           | 34.9 (12.8)  | 70.9 (2.4)  |
| Clethodim                    | Cyclohexene oxime | 67.8 (4.9)           | 63.2 (9.9)   | 82.1 (8.2)  |
| Cyclosulfamuron              | Sulfonylurea      | 36.1 (1.1)           | 49.8 (20.1)  | 91.8 (1.0)  |
| Ethoxysulfuron               | Sulfonylurea      | 22.7 (0.6)           | 34.7 (15.3)  | 83.4 (2.1)  |
| Fenquinotriene               | Triketone         | 4.9 (1.4)            | 11.0 (5.3)   | 54.1 (3.2)  |
| Halosulfuron-methyl          | Sulfonylurea      | 53.3 (8.5)           | 58.8 (15.3)  | 87.5 (9.4)  |
| Haloxyfop                    | Propionic acid    | 3.5 (0.7)            | 6.4 (5.8)    | 91.7 (1.6)  |
| Imazamox                     | Imidazolinone     | 2.6 (0.4)            | 13.4 (12.1)  | 70.1 (2.9)  |
| Imazapic                     | Imidazolinone     | 3.2 (0.2)            | 10.6 (9.3)   | 70.1 (5.0)  |
| Imazaquin                    | Imidazolinone     | 1.6 (0.2)            | 6.2 (6.7)    | 72.2 (4.0)  |
| Imazethapyr                  | Imidazolinone     | 3.9 (0.9)            | 11.7 (10.7)  | 67.6 (3.4)  |
| Imazosulfuron                | Sulfonylurea      | 28.5 (1.0)           | 39.2 (13.9)  | 74.8 (2.4)  |
| Metazosulfuron               | Sulfonylurea      | 42.3 (4.8)           | 49.8 (9.7)   | 81.1 (2.2)  |
| Methamidophos                | Organophosphate   | 68.5 (5.8)           | 70.0 (11.3)  | 83.9 (3.6)  |
| Nicosulfuron                 | Sulfonylurea      | 5.7 (0.3)            | 20.5 (17.3)  | 77.4 (4.6)  |
| Penoxsulam                   | Sulfonamide       | 34.3 (2.8)           | 41.3 (17.2)  | 90.6 (9.7)  |
| Probenazole                  | Sulfonamide       | 54.9 (2.2)           | 68.4 (14.4)  | 93.7 (2.9)  |
| Pyrimisulfan                 | Sulfonamide       | 64.8 (0.9)           | 61.6 (5.0)   | 97.8 (0.4)  |
| Saflufenacil                 | Sulfonamide       | 43.9 (8.7)           | 57.4 (18.7)  | 98.2 (2.7)  |
| Sethoxydim A                 | Cyclohexene oxime | 71.0 (1.9)           | 67.3 (1.9)   | 80.5 (2.0)  |
| Spirotetramat-enol           | Tetramic acid     | 20.8 (1.1)           | 36.2 (20.4)  | 96.5 (3.9)  |
| Sulfentrazone                | Sulfonamide       | 66.6 (9.5)           | 61.7 (14.5)  | 101.6 (1.1) |
| Tepraloxydim                 | Cyclohexene oxime | 70.7 (18.0)          | 63.5 (11.0)  | 85.7 (4.1)  |
| Thidiazuron                  | Thiadiazolylurea  | 68.4 (1.1)           | 57.3 (5.0)   | 94.9 (1.7)  |
| Thifensulfuron-methyl        | Sulfonylurea      | 16.6 (0.7)           | 28.7 (16.3)  | 84.4 (3.9)  |
| ( <i>cf.</i> ) Spirotetramat | Tetramic acid     | 112.9 (6.4)          | 104.6 (21.9) | 97.0 (6.2)  |
| ( <i>cf.</i> ) TCMTB         | Others            | 15.9 (3.0)           | 11.9 (0.3)   | 18.2 (5.0)  |

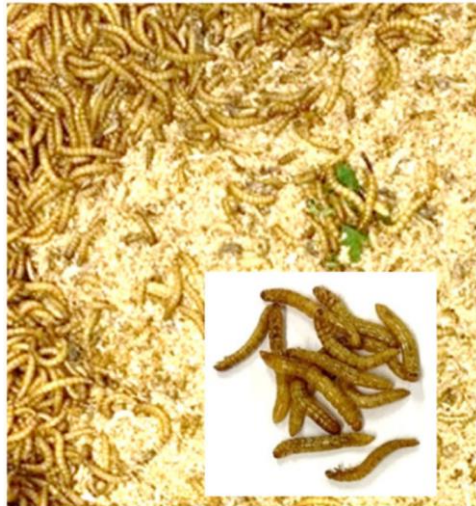

**Figure S1.** Mealworms grown in wheat bran.
